# Supplementary material for: Neonates with Maternal Colonization of Carbapenemase-Producing, Carbapenem-Resistant Enterobacteriaceae: A Mini-Review and a Suggested Guide for Preventing Neonatal Infection
Source: MDPI journal article supplement (doi:10.3390/children8050399), 2021-05-15
Supplement: s1 [file s1]

# CP-CRE Mini-review

## Supplementary Material

**Table S1.** Summary of microbiology cultures.

| Date of life  | Clinical indicator                                               | Blood culture                       | Urine culture | CSF culture | Swabs done                                                                                                                                                                                                             | Sensitivity pattern                                                                                                                          |             | Antibiotics administered                                                                                                                                                                                                                                   |
|---------------|------------------------------------------------------------------|-------------------------------------|---------------|-------------|------------------------------------------------------------------------------------------------------------------------------------------------------------------------------------------------------------------------|----------------------------------------------------------------------------------------------------------------------------------------------|-------------|------------------------------------------------------------------------------------------------------------------------------------------------------------------------------------------------------------------------------------------------------------|
|               |                                                                  |                                     |               |             |                                                                                                                                                                                                                        | Antibiotic                                                                                                                                   | Sensitivity |                                                                                                                                                                                                                                                            |
| Case 1 Twin A |                                                                  |                                     |               |             |                                                                                                                                                                                                                        |                                                                                                                                              |             |                                                                                                                                                                                                                                                            |
| 1             | Cardiorespiratory distress at birth, premature spontaneous labor | No growth after 36 hours incubation |               |             | Rectal - Klebsiella pneumoniae (ESBL producer) – heavy growth<br>Axilla - Klebsiella pneumoniae (ESBL producer) – light growth.<br>ETT - No Ureaplasma urealyticum isolated.<br>No Large colony of Mycoplasma isolated | Klebsiella pneumoniae<br>Ampicillin R<br>Cefotaxime/Cefotolozane S<br>Tazobactam S<br>Gentamicin S<br>Gentamicin<br>Meropenem<br>Tigecycline |             | Empiric ampicillin and gentamicin commenced at birth. Gentamicin switched to Colistin with further clinical deterioration. Colistin given as intravenous 5mg/kg/day divided q 8 hourly. Antibiotics stopped with negative blood culture result at 36 hours |
| 3             | Surveillance                                                     |                                     |               |             | ETT, umbilical, rectal for NDM1 E. coli - No                                                                                                                                                                           |                                                                                                                                              |             |                                                                                                                                                                                                                                                            |

|    |                                                                                          |                                     |                                              |           |                                                                                                      |                                                                                                                 |
|----|------------------------------------------------------------------------------------------|-------------------------------------|----------------------------------------------|-----------|------------------------------------------------------------------------------------------------------|-----------------------------------------------------------------------------------------------------------------|
|    |                                                                                          |                                     |                                              |           | carbapenemase-producing organisms isolated.                                                          |                                                                                                                 |
| 8  | Surveillance                                                                             |                                     |                                              |           | ETT,<br>umbilical,<br>rectal,<br>axillary for<br>NDM1 CPE -<br>No growth                             |                                                                                                                 |
| 29 | Persistent tachycardia HR 190-200, lethargy, C-reactive protein increasing from 68 to 88 | No growth after 36 hours incubation | Escherichia coli (non-ESBL producing strain) | No growth | <b>Escherichia coli</b><br>Ampicillin S<br>Cefotaxime S<br>Gentamicin S<br>Meropenem                 | Empiric ampicillin, Colistin and Meropenem commenced. Ampicillin only continued for 7 days with culture results |
| 30 | Surveillance                                                                             |                                     |                                              |           | ETT,<br>umbilical,<br>rectal,<br>axillary for the<br>carbapenemase-producing organism -<br>No growth |                                                                                                                 |
| 43 | Surveillance                                                                             |                                     |                                              |           | Nose and perianal/rectal - No growth                                                                 |                                                                                                                 |

#### Case 1 Twin B

|   |                                                                   |                                     |                                                                                                     |                                                                                                                             |                                                                                                             |
|---|-------------------------------------------------------------------|-------------------------------------|-----------------------------------------------------------------------------------------------------|-----------------------------------------------------------------------------------------------------------------------------|-------------------------------------------------------------------------------------------------------------|
| 1 | Cardiorespiratory distress at birth, premature spontaneous labour | No growth after 36 hours incubation | Rectal - Klebsiella pneumoniae (ESBL producer) – light growth. Axilla, Gastric aspirate - No growth | <b>Klebsiella pneumoniae</b><br>Ampicillin R<br>cefotaxime R<br>/ Cefotolozane S<br>tazobactam S<br>gentamicin<br>Meropenem | Empiric ampicillin and gentamicin commenced at birth. Gentamicin switched to Colistin with further clinical |
|---|-------------------------------------------------------------------|-------------------------------------|-----------------------------------------------------------------------------------------------------|-----------------------------------------------------------------------------------------------------------------------------|-------------------------------------------------------------------------------------------------------------|

|    |                                                                     |                                     |           |                                                                                         |                                                                                                                                                   |
|----|---------------------------------------------------------------------|-------------------------------------|-----------|-----------------------------------------------------------------------------------------|---------------------------------------------------------------------------------------------------------------------------------------------------|
|    |                                                                     |                                     |           | Tigecycline                                                                             | deterioration.<br>Colistin given as intravenous 5mg/kg/day divided q 8 hourly. Antibiotics stopped with negative blood culture result at 36 hours |
| 3  | Surveillance                                                        |                                     |           | ETT, umbilical, rectal for NDM1 E. coli - No carbapenemase-producing organisms isolated |                                                                                                                                                   |
| 8  | Surveillance                                                        |                                     |           | ETT, umbilical, rectal, axillary for NDM1 CPE - No growth                               |                                                                                                                                                   |
| 15 | Blood in stool, necrotizing enterocolitis considered but ruled out  | No growth after 36 hours incubation |           |                                                                                         | No antibiotics commenced                                                                                                                          |
| 30 | Surveillance                                                        |                                     |           | ETT, umbilical, rectal, axillary for the carbapenemase-producing organism – No growth   |                                                                                                                                                   |
| 37 | Increasing ventilatory requirement, right upper lobe collapse chest | No growth after 36 hours incubation | No growth | ETT - Heavy growth of Staphylococcus aureus, moderate growth of                         | <u>Staphylococcus aureus</u><br>Cloxacillin S<br>Penicillin R<br>Vancomycin S<br><u>Klebsiella pneumoniae</u>                                     |

|    |                                                                                |                                     |                                                     |                                                                            |                                                                                                                                                           |                                      |                                                         |
|----|--------------------------------------------------------------------------------|-------------------------------------|-----------------------------------------------------|----------------------------------------------------------------------------|-----------------------------------------------------------------------------------------------------------------------------------------------------------|--------------------------------------|---------------------------------------------------------|
|    | radiograph, initially improved with ventilatory maneuvers                      |                                     |                                                     | Klebsiella pneumoniae (ESBL producer) and scant growth of Escherichia coli | Ampicillin<br>Cefotaxime<br>Gentamicin<br>Meropenem                                                                                                       | R<br>R<br>S<br>S                     |                                                         |
|    |                                                                                |                                     |                                                     |                                                                            | <b>Escherichia coli</b>                                                                                                                                   |                                      |                                                         |
|    |                                                                                |                                     |                                                     |                                                                            | Ampicillin<br>Cefotaxime<br>Gentamicin<br>Meropenem                                                                                                       | S<br>S<br>S<br>S                     |                                                         |
| 42 | Persisting increasing ventilatory requirement                                  |                                     |                                                     | ETT aspirate - Staphylococcus aureus and Escherichia coli (ESBL producer)  | <b>Staphylococcus aureus</b><br>Cloxacillin<br>Penicillin<br>Vancomycin<br><b>Escherichia coli</b><br>Ampicillin<br>Cefotaxime<br>Gentamicin<br>Meropenem | S<br>R<br>S<br>S<br>R<br>R<br>S<br>S | Ertapenem for 10 days for ventilator acquired pneumonia |
| 43 | Increasing oxygen requirement, related to symptomatic patent ductus arteriosus | No growth after 36 hours incubation | 1 to 10 X E5 CFU/L Coagulase-negative staphylococci |                                                                            | <b>Coagulase-negative staphylococci</b><br>Ampicillin<br>Cloxacillin<br>Vancomycin                                                                        | R<br>R<br>S                          | Assumed contamination                                   |
| 63 | Surveillance                                                                   |                                     |                                                     | Umbilical, nose and perianal/rectal - No growth                            |                                                                                                                                                           |                                      |                                                         |

Note. CPE= carbapenemase-producing Enterobacteriaceae, CFU= colony forming units, CSF= cerebrospinal fluid, E.coli = Escherichia coli, ESBL= extended spectrum beta-lactamases, ETT=endotracheal tube, NDM= New Delhi metallo-β-lactamase, PCR= polymerase chain reaction, R= resistant, S = sensitive.
